# Supplementary material
Source: PubMed Central journal article supplement (PMC3478615)
Supplement: 1202529109_pnas.201202529SI.pdf [file 1202529109_pnas.201202529SI.pdf]

# Supporting Information

Gordon et al. 10.1073/pnas.1202529109

## SI Methods

**Cardiovascular Testing Details.** Fasting carotid-femoral pulse wave velocity ( $PWV_{cf}$ ) was determined by measuring the propagation time of the pressure pulse from the carotid to femoral arteries (1). Propagation time ( $\Delta t_{cf}$ ) was calculated by measuring the time lag between the R-wave of the simultaneous ECG and the arrival of the arterial pulse at both the carotid ( $\Delta t_c$ ) and femoral ( $\Delta t_f$ ) arteries. The distance between the carotid and femoral arteries ( $l_{cf}$ ) was measured and recorded.  $PWV_{cf}$  was calculated using the formula  $PWV_{cf} = l_{cf}/\Delta t_{cf}$ .

Fasting diagnostic carotid artery ultrasonography was performed using established protocols (2) in a laboratory accredited by the Intersocietal Commission for the Accreditation of Vascular Laboratories. A Philips iU22  $\mu$ Ltrasound machine equipped with an L17-5 MHz broadband linear-array transducer was used.

Carotid stenoses were graded using velocity ratios, and pulsed-wave Doppler was performed with appropriate angle correction. Mean distal internal carotid artery velocity was calculated using a formula that adds one-third of the peak systolic velocity plus two-thirds of the end diastolic velocity, as previously described (3). Gray map 5 was used on all studies after adjusting overall gain so that intraluminal blood appeared black. Digital gain compensation was kept perpendicular.

Distal common carotid artery far-wall intima-media thickness was measured from the intima-lumen border to the media-adventitia border over a 2-cm segment according to a standard protocol (1) using edge-detection software (Medical Imaging Applications) (4).

**Quadriceps Muscle Dynamometry.** Quadriceps muscle strength was evaluated bilaterally using a standard method (5). The patient was positioned sitting with hip and knee flexed to 90° and with the back unsupported. Knee position was maintained to achieve an isometric contraction. Use of hands on a mat for support was permitted. A hand-held dynamometer (Model 01163; Lafayette Instrument Company) was placed on the distal anterior tibia just proximal to the ankle joint. A 3-s maximal isometric contraction was performed followed by a brief rest. Three repetitions were performed on each leg.

**Lonafarnib Pharmacokinetic Analysis.** Plasma concentrations of lonafarnib were determined at 115 mg/m<sup>2</sup> and 150 mg/m<sup>2</sup> at 0, 1, 2, 4, 6, and 8 h postdose by HPLC/ion chromatography (IC) tandem mass spectrometry (6). Lonafarnib pharmacokinetics (PK) were determined using noncompartmental analyses. The lower limit of quantitation for lonafarnib was 5 ng/mL with a linear standard curve over a concentration range of 5–2,500 ng/mL. The coefficient of variation and accuracy (% bias) were less than 11% and less than 10%, respectively. Individual plasma lonafarnib concentrations were used for PK analysis using model-independent methods (7). The area under the plasma-concentration time curve from time 0 to 12 h after dose [AUC(0–12)] was calculated using the linear trapezoidal method, where concentration at 0 h also was used as an estimate of plasma concentration at 12 h for each concentration–time profile (steady state achieved at 4 and 8 mo). The apparent total-body clearance at steady state was calculated by dividing the dose by AUC(0–12). Interpatient variability of the PK parameters was expressed as percent coefficient of variation. Plasma concentration values of patients who had multiple-cycle PK samples were modeled via a mixed-effects approach in an effort to explore dose and cycle effects.

**Pharmacodynamics.** HDJ-2 farnesylation status as a surrogate marker of lonafarnib activity was assayed in lysates from peripheral blood mononuclear cells pretherapy, at 52 wk on lonafarnib, and at end of therapy. Western blotting for HDJ-2 gel mobility shifts was performed as previously reported (8). Western blots were quantified using a Molecular Imager Gel Dock XR densitometer (Bio-Rad). Data were analyzed using Quantity One software (Bio-Rad). Samples with enough protein were run in duplicate ( $n = 40$  of 92 samples analyzed), with close agreement between samples. Inhibition was defined as >10% of HDJ-2 in the unfarnesylated form.

## SI Results

### Confidence Interval Comparisons.

| End point                                                       | No. patients | Point estimate (%) | 90% exact binomial confidence interval (CI, %) | 95% exact binomial CI (%) |
|-----------------------------------------------------------------|--------------|--------------------|------------------------------------------------|---------------------------|
| ≥50% Increase in rate of weight gain                            | 9/25         | 36                 | 20–54                                          | 18–58                     |
| ≥3% Increase in areal bone mineral density at at least one site | 19/25        | 76                 | 58–89                                          | 55–91                     |
| Any decrease in bone mineral density                            | 10/25        | 40                 | 24–58                                          | 21–61                     |
| Low frequency sensorineural hearing improvement ≥ 10 dB         | 8/18         | 44                 | 24–66                                          | 22–69                     |

**Frequency of ECG Abnormalities.** Twelve-lead ECG was performed at 4-mo intervals. Fourteen of 26 patients (54%) had no abnormality identified at any time during the course of the study. At baseline, 8 of 26 patients (31%) had ECG abnormalities, compared with 4 of 25 patients (16%) at end of therapy; major ECG abnormalities on 12-lead ECG did not change significantly during the course of the study.

ECG changes consistent with left ventricular hypertrophy (LVH) with or without LV strain pattern was seen in 3 of 26 patients (12%) with a mean age of 11.9 y; borderline LVH was identified at entry or transiently during the study in four additional patients (15%). Atrial enlargement was noted in one patient with history of supraventricular tachycardia.

Isolated nonspecific ST-T wave changes were identified transiently in four patients and consistently in one patient without other abnormalities. Prolonged QT intervals ( $QT_c > 0.44$  s) were observed only transiently in 4 of 26 patients (15%), although none had  $QT_c > 0.45$  s or demonstrated persistent  $QT_c$  prolongation. Two patients had prior history of supraventricular tachycardia before entry, and none had uncontrolled rhythm disturbance identified during the course of study.

Significant left ventricular hypertrophy tended to be identified in older patients compared with those patients with normal ECGs or those with isolated ST-T wave changes (11.9 y vs. 6.7 y, respectively). Two of three patients with LVH had been prescribed antihypertensive medication before study entry.

**Audiology.** We found pretherapy conductive hearing loss in 21 of 23 children at low frequencies and in 7 of 23 children at high frequencies. At end of therapy, median hearing thresholds were significantly different for high-frequency conductive hearing in

the poorer-hearing ear ( $P = 0.01$ ) but not in the better-hearing ear; no change was detected in low-frequency hearing in the poorer- or better-hearing ears. From a clinical perspective, no ear changed by  $\geq 10$  dB.

**Pharmacodynamics.** As shown in Table S6, in some patients (both responders and nonresponders), accumulation of unfarnesylated HDJ-2 was observed at only one of the two on-treatment time points. The reason for this inpatient variability is not known. Positive controls [cultured cells treated in vitro with a farnesyltransferase inhibitor (FTI)] were included in all experiments and consistently demonstrated appropriate shifts. Variability between time points also was observed in some patient samples from a prior study of lonafarnib in cancer (see below) (9). In the study reported by Feldman et al. (9), 59 patients had evaluable HDJ-2 blots at two on-treatment time points as well as at baseline. Of these patients, 17 (29%) showed no shift in HDJ-2 at either time point, 31 (53%) showed shifts of comparable magnitude at both on-drug time points, and 11 (19%) showed shifts at only one of the two on-treatment time points evaluated (eight

had shifts at cycle 1 day 15 only, and three had shifts at cycle 2 day 1 only). Although the percentages and time points for longitudinal sampling are different in the two studies, both show that the extent of inhibition of HDJ-2 farnesylation varied at different on-treatment time points.

**Additional Acknowledgments.** Most importantly, we are grateful to the children with progeria and their families, and to the children who participated as control subjects, for participation in this study. We thank the Family Inn (Cambridge, MA) and Devon Nicole House (Boston, MA) for housing families; Susan Campbell, MS, Nancy Wolff-Jensen, and Nancy Grossman for medical records coordination; Kyra Johnson, Kelly Littlefield, Kiera McKendrick, Angela Kraybill, and William Fletcher for coordinator services; Ethan Bickford for photographic assistance; James Miller, CPO and National Orthotics and Prosthetics Company for podiatric assistance; administrative, nursing, and processing staff at the CHB Clinical and Translational Study Unit; David Bowling and Rocco Anzaldi, RPh for pharmacy assistance; Nicole Wake for echocardiography assistance; Marie Migliaccio for graphic art; Merck Research Labs/Schering-Plough Research Institute for providing lonafarnib, PK and PD studies; Susan Arbuck, MD, Emily Frank, MS, David Harris, PhD, Bhavna Kantesaria, MS, Paul Kirschmeier, PhD, Antoinette Lee, and Yali Zhu, MS for assistance with lonafarnib; Stephen Young, MD, Loren Fong, PhD, and Marsha Moses, PhD for biomarker evaluation; and Elizabeth Nabel, MD, for review of the manuscript.

1. O'Rourke MF, Staessen JA, Vlachopoulos C, Duprez D, Plante GE (2002) Clinical applications of arterial stiffness; definitions and reference values. *Am J Hypertens* 15: 426–444.
2. Gerhard-Herman M, et al.; American Society of Echocardiography; Society of Vascular Medicine and Biology(2006) Guidelines for noninvasive vascular laboratory testing: A report from the American Society of Echocardiography and the Society of Vascular Medicine and Biology. *J Am Soc Echocardiogr* 19:955–972.
3. Pawlak MA, et al. (2009) Sickle cell disease: Ratio of blood flow velocity of intracranial to extracranial cerebral arteries—initial experience. *Radiology* 251:525–534.
4. Roman MJ, et al.; American Society of Echocardiography; Society of Vascular Medicine and Biology(2006) Clinical application of noninvasive vascular ultrasound in cardiovascular risk stratification: Report from the American Society of Echocardiography and the Society of Vascular Medicine and Biology. *J Am Soc Echocardiogr* 19:943–954.
5. Merlini L, Mazzone ES, Solari A, Morandi L (2002) Reliability of hand-held dynamometry in spinal muscular atrophy. *Muscle Nerve* 26:64–70.
6. Appels NM, van Maanen MJ, Rosing H, Schellens JH, Beijnen JH (2005) Quantitative analysis of the farnesyl transferase inhibitor lonafarnib (Sarasartrade mark, SCH66336) in human plasma using high-performance liquid chromatography coupled with tandem mass spectrometry. *Rapid Commun Mass Spectrom* 19:2187–2192.
7. Gibaldi P, Perrier D, eds (1982) *Pharmacokinetics* (Marcel Dekker, Inc, New York), pp 409–417.
8. Adjei AA, et al. (2000) A Phase I trial of the farnesyl transferase inhibitor SCH66336: Evidence for biological and clinical activity. *Cancer Res* 60:1871–1877.
9. Feldman EJ, et al. (2008) On the use of lonafarnib in myelodysplastic syndrome and chronic myelomonocytic leukemia. *Leukemia* 22:1707–1711.









**Table S1. Toxicities possibly related to lonafarnib**

| Toxicity                      | Grade | No. patients exhibiting toxicity during entire trial period* (n = 26) | Number of patients exhibiting toxicity during time period specified (months on treatment) |     |      |       |       |        |
|-------------------------------|-------|-----------------------------------------------------------------------|-------------------------------------------------------------------------------------------|-----|------|-------|-------|--------|
|                               |       |                                                                       | 0-4                                                                                       | 4-8 | 8-12 | 12-16 | 12-16 | 20-end |
| <b>Gastrointestinal</b>       |       |                                                                       |                                                                                           |     |      |       |       |        |
| Diarrhea                      | 1     | 21                                                                    | 21                                                                                        | 18  | 19   | 16    | 14    | 17     |
|                               | 2     | 2                                                                     | 1                                                                                         | 0   | 0    | 1     | 1     | 0      |
|                               | 3     | 3                                                                     | 0                                                                                         | 0   | 0    | 1     | 1     | 1      |
| Vomiting                      | 1     | 13                                                                    | 13                                                                                        | 13  | 11   | 9     | 5     | 4      |
|                               | 2     | 4                                                                     | 3                                                                                         | 0   | 1    | 0     | 1     | 0      |
|                               | 3     | 2                                                                     | 1                                                                                         | 0   | 0    | 0     | 1     | 0      |
| Dehydration                   | 3     | 1                                                                     | 0                                                                                         | 0   | 0    | 1     | 0     | 0      |
| Constipation                  | 1     | 7                                                                     | 7                                                                                         | 2   | 0    | 0     | 0     | 0      |
|                               | 2     | 1                                                                     | 1                                                                                         | 0   | 0    | 0     | 0     | 0      |
| Dyspepsia                     | 1     | 1                                                                     | 0                                                                                         | 0   | 0    | 1     | 0     | 0      |
| <b>Constitutional</b>         |       |                                                                       |                                                                                           |     |      |       |       |        |
| Fatigue                       | 1     | 14                                                                    | 10                                                                                        | 3   | 3    | 5     | 5     | 4      |
|                               | 2     | 2                                                                     | 1                                                                                         | 0   | 0    | 1     | 1     | 1      |
| Nausea                        | 1     | 13                                                                    | 13                                                                                        | 6   | 2    | 2     | 2     | 2      |
|                               | 2     | 1                                                                     | 0                                                                                         | 0   | 0    | 1     | 0     | 0      |
| Anorexia                      | 1     | 10                                                                    | 9                                                                                         | 4   | 5    | 5     | 4     | 5      |
|                               | 2     | 2                                                                     | 0                                                                                         | 0   | 1    | 0     | 1     | 0      |
| Fever                         | 1     | 9                                                                     | 4                                                                                         | 2   | 5    | 2     | 0     | 1      |
|                               | 2     | 2                                                                     | 0                                                                                         | 0   | 0    | 1     | 1     | 0      |
|                               | 4     | 1                                                                     | 0                                                                                         | 0   | 0    | 0     | 1     | 0      |
| <b>Organ function</b>         |       |                                                                       |                                                                                           |     |      |       |       |        |
| Elevated AST                  | 1     | 11                                                                    | 4                                                                                         | 3   | 2    | 3     | 2     | 4      |
|                               | 3     | 1                                                                     | 1                                                                                         | 0   | 0    | 0     | 0     | 0      |
| Elevated ALT                  | 1     | 8                                                                     | 5                                                                                         | 2   | 2    | 2     | 2     | 2      |
|                               | 2     | 1                                                                     | 1                                                                                         | 1   | 0    | 0     | 0     | 0      |
|                               | 3     | 1                                                                     | 1                                                                                         | 0   | 0    | 0     | 0     | 0      |
| Elevated alkaline phosphatase | 1     | 2                                                                     | 1                                                                                         | 1   | 0    | 1     | 0     | 0      |
|                               | 2     | 2                                                                     | 0                                                                                         | 0   | 2    | 0     | 0     | 0      |
| Low Absolute Leukocyte Count  | 1     | 3                                                                     | 0                                                                                         | 1   | 0    | 2     | 1     | 0      |
|                               | 2     | 2                                                                     | 0                                                                                         | 0   | 1    | 2     | 0     | 0      |
| Low white blood cell count    | 1     | 10                                                                    | 4                                                                                         | 3   | 5    | 5     | 5     | 1      |
| Low absolute neutrophil count | 1     | 14                                                                    | 7                                                                                         | 6   | 10   | 5     | 6     | 5      |
| Low hemoglobin                | 2     | 3                                                                     | 1                                                                                         | 1   | 0    | 0     | 2     | 0      |
|                               | 1     | 9                                                                     | 9                                                                                         | 3   | 5    | 5     | 6     | 2      |
| 2                             | 2     | 0                                                                     | 2                                                                                         | 2   | 0    | 0     | 0     | 1      |
| <b>Metabolic</b>              |       |                                                                       |                                                                                           |     |      |       |       |        |
| Hypermagnesemia               | 1     | 7                                                                     | 5                                                                                         | 3   | 2    | 1     | 1     | 1      |
| Hyperkalemia                  | 1     | 3                                                                     | 2                                                                                         | 2   | 1    | 0     | 1     | 1      |
| Hypokalemia                   | 1     | 2                                                                     | 1                                                                                         | 0   | 0    | 0     | 1     | 0      |
|                               | 3     | 4                                                                     | 0                                                                                         | 1   | 0    | 2     | 1     | 0      |
| Hyponatremia                  | 1     | 11                                                                    | 3                                                                                         | 5   | 3    | 2     | 2     | 5      |
| Hypocalcemia                  | 1     | 1                                                                     | 0                                                                                         | 0   | 0    | 0     | 0     | 1      |
|                               | 2     | 1                                                                     | 0                                                                                         | 0   | 0    | 0     | 0     | 1      |
| Hypercalcemia                 | 1     | 6                                                                     | 3                                                                                         | 2   | 1    | 2     | 0     | 1      |
| Depressed serum bicarbonate   | 1     | 10                                                                    | 5                                                                                         | 6   | 1    | 3     | 4     | 4      |
| Hypoglycemia                  | 1     | 2                                                                     | 2                                                                                         | 1   | 1    | 1     | 1     | 1      |
|                               | 2     | 1                                                                     | 1                                                                                         | 0   | 0    | 0     | 0     | 0      |
|                               | 3     | 1                                                                     | 0                                                                                         | 0   | 0    | 1     | 0     | 0      |
| Hyperglycemia                 | 1     | 4                                                                     | 1                                                                                         | 2   | 0    | 0     | 1     | 1      |
|                               | 2     | 2                                                                     | 0                                                                                         | 0   | 0    | 0     | 1     | 1      |
| <b>Other</b>                  |       |                                                                       |                                                                                           |     |      |       |       |        |
| Granuloma                     | 1     | 1                                                                     | 1                                                                                         | 1   | 1    | 1     | 1     | 1      |
| Perineal edema                | 1     | 1                                                                     | 0                                                                                         | 1   | 1    | 0     | 0     | 0      |
| Raynaud's phenomenon          | 2     | 1                                                                     | 0                                                                                         | 0   | 0    | 1     | 0     | 0      |

\*Per patient count is once for that patient's highest toxicity grade.

**Table S2. Factors contributing to rate of weight gain**

| Factor                            | Weight gain end point |                  |                        |                  | Wilcoxon rank-sum<br>P value |
|-----------------------------------|-----------------------|------------------|------------------------|------------------|------------------------------|
|                                   | Achieved (n = 9)*     |                  | Not achieved (n = 16)* |                  |                              |
|                                   | Median                | Range            | Median                 | Range            |                              |
| <b>Body composition</b>           |                       |                  |                        |                  |                              |
| Total lean tissue mass (g)        |                       |                  |                        |                  |                              |
| Pretreatment                      | 7,334.5               | 5,632.1–15,036.8 | 8,815.9                | 5,531.4–13,865.8 | 0.005                        |
| Posttreatment                     | 8,269.8               | 6,665.7–17,022.5 | 9,405.9                | 5,333.0–14,276.2 |                              |
| Fold change                       | 1.10                  | 1.07–1.18        | 1.05                   | 0.89–1.14        |                              |
| Total aBMD(g/cm <sup>2</sup> )    |                       |                  |                        |                  |                              |
| Pretreatment                      | 0.437                 | 0.413–0.601      | 0.491                  | 0.369–0.651      | 0.04                         |
| Posttreatment                     | 0.449                 | 0.420–0.643      | 0.500                  | 0.404–0.589      |                              |
| Fold change                       | 1.04                  | 0.96–1.08        | 1.01                   | 0.85–1.09        |                              |
| Total fat mass (g)                |                       |                  |                        |                  |                              |
| Pretreatment                      | 1,757.0               | 11,86.6–2,109.1  | 1,482.9                | 11,58.7–4,059.8  | 0.78                         |
| Posttreatment                     | 1,675.4               | 1,250.8–2,669.9  | 1,613.3                | 12,09.0–2,379.7  |                              |
| Fold change                       | 0.93                  | 0.69–1.76        | 1.06                   | 0.54–1.33        |                              |
| Total % body fat                  |                       |                  |                        |                  |                              |
| Pretreatment                      | 17.0                  | 11.0–24.0        | 14.3                   | 9.3–31.6         | 0.50                         |
| Posttreatment                     | 15.5                  | 12.8–24.1        | 15.1                   | 10.0–20.8        |                              |
| Fold change                       | 0.84                  | 0.69–1.48        | 1.02                   | 0.57–1.24        |                              |
| <b>Energy balance</b>             |                       |                  |                        |                  |                              |
| Total energy intake (kcal/d)      |                       |                  |                        |                  |                              |
| Pretreatment                      | 1,089                 | 859–1,601        | 1,236                  | 680–1,625        | 0.75                         |
| Posttreatment                     | 1,062                 | 834–2,246        | 1,271                  | 834–2,020        |                              |
| Fold change                       | 1.00                  | 0.59–1.48        | 0.99                   | 0.69–2.83        |                              |
| Energy intake as % RDA            |                       |                  |                        |                  |                              |
| Pretreatment                      | 130                   | 96–195           | 165                    | 96–279           | 0.48                         |
| Posttreatment                     | 136                   | 95–209           | 176                    | 141–272          |                              |
| Fold change                       | 1.03                  | 0.551–.61        | 1.15                   | 0.79–2.67        |                              |
| MREE(kcal/d)                      |                       |                  |                        |                  |                              |
| Pretreatment                      | 641                   | 499–857          | 589                    | 241–889          | 0.82                         |
| Posttreatment                     | 715                   | 567–898          | 677                    | 379–931          |                              |
| Fold change                       | 1.13                  | 0.87–1.29        | 1.12                   | 0.73–1.98        |                              |
| <b>Quadriceps muscle strength</b> |                       |                  |                        |                  |                              |
| Left quadriceps (kg)              |                       |                  |                        |                  |                              |
| Pretreatment                      | 5.4                   | 3.0–11.7         | 5.6                    | 2.2–11.4         | 0.93                         |
| Posttreatment                     | 5.6                   | 4.01–0.8         | 5.1                    | 3.0–10.6         |                              |
| Fold change                       | 1.1                   | 0.7–1.4          | 1.0                    | 0.8–1.6          |                              |
| Right quadriceps (kg)             |                       |                  |                        |                  |                              |
| Pretreatment                      | 6.0                   | 3.4–9.2          | 5.6                    | 3.0–12.6         | 0.26                         |
| Posttreatment                     | 5.8                   | 3.9–13.0         | 5.7                    | 3.0–11.7         |                              |
| Fold change                       | 1.1                   | 0.8–1.7          | 1.0                    | 0.7–1.2          |                              |

aBMD, areal bone mineral density; MREE, measured resting energy expenditure; RDA, recommended dietary allowance.

\*One patient in the achieved group and four patients in the not-achieved group received recombinant growth hormone therapy.

**Table S3. Effect of lonafarnib on carotid artery density by ultrasound**

| Site                         | Percentile | Median density in pixels (range) |                    |                    | P value            |                              |                    |
|------------------------------|------------|----------------------------------|--------------------|--------------------|--------------------|------------------------------|--------------------|
|                              |            | Control (n = 55)                 | HG(P) (n = 22)     | HG(E) (n = 22)     | Control vs. HG(P)* | HG(P) vs. HG(E) <sup>†</sup> | Control vs. HG(E)* |
| Intima media                 | 10         | 52.0 (8.0–107.0)                 | 61.0 (8.0–174.0)   | 41.0 (0.0–93.0)    | 0.02               | 0.002                        | 0.68               |
| Adventitia luminal near wall | 10         | 112.0 (49.0–193.0)               | 159.0 (33.0–246.0) | 103.0 (40.0–215.0) | 0.002              | 0.005                        | 0.47               |
| Adventitia deep near wall    | 10         | 132.0 (5–226.0)                  | 102.0 (10.0–228.0) | 88.0 (0.0–169.0)   | 0.06               | 0.04                         | <0.0001            |

HG(E) HGPS, end of therapy; HG(P), HGPS pretherapy.

\*Based on Wilcoxon rank-sum test.

<sup>†</sup>Wilcoxon signed-rank test based on distributions of fold-change (post/pre) calculated for each patient.



**Table S4. Clinically significant changes in areal BMD (n = 25)**

| Site         | No. patients with >3% increase | No. patients with >3% decrease | No. patients with no significant change* |
|--------------|--------------------------------|--------------------------------|------------------------------------------|
| Total body   | 11                             | 4                              | 10                                       |
| Lumbar spine | 11                             | 7                              | 7                                        |
| Hip          | 11                             | 4                              | 10                                       |

\*Change between -3% and +3%.

**Table S5. Lonafarnib pharmacokinetics**

Mean (CV,%) PK parameters for lonafarnib

|                                                    |              |              |
|----------------------------------------------------|--------------|--------------|
| Dose (mg/m <sup>2</sup> )                          | 115 (n = 24) | 150 (n = 21) |
| C <sub>max</sub> (µg/mL)                           | 1.77 (60)    | 2.64 (41)    |
| Median T <sub>max</sub> (h) (range)                | 2.0 (0-6)    | 4.0 (0-6)    |
| AUC(0-12 h)(µg·h <sup>-1</sup> ·mL <sup>-1</sup> ) | 13.2 (62)    | 20.6 (36)    |

CV, Coefficient of variation; C<sub>max</sub>, maximum concentration; T<sub>max</sub>, time to maximum concentration.

**Table S6. Lonafarnib pharmacodynamics: Patients with unfarnesylated HDJ-2 detected at week 52 and/or end of study (n = 25)**

| Detected at week 52 on therapy | Detected at end of study | No. (%) with unfarnesylated HDJ-2 |
|--------------------------------|--------------------------|-----------------------------------|
| No                             | No                       | 12 (48)                           |
| Yes                            | No                       | 6 (24)                            |
| No                             | Yes                      | 3 (12)                            |
| Yes                            | Yes                      | 4 (16)                            |
